# Supplementary material
Source: publisher site journal article supplement (https://www.spandidos-publications.com/2791/downloadSupplementary)

Figure S1. (A) Western blotting for p63, TRIC, LSR and OCLN in Detroit 562 cells treated with HDAC inhibitors at 1 and 10  $\mu$ M. (B) Immunocytochemical staining for TRIC in Detroit 562 cells treated with 10  $\mu$ M HDAC inhibitors. Scale bar, 10  $\mu$ m. TRIC, tricellulin; LSR, lipolysis-stimulated lipoprotein receptor; OCLN, occludin; HDAC, histone deacetylase; iHDAC, HDAC inhibitor; Ac-tub, acetylated tubulin; TSA, trichostatin A; C, control.

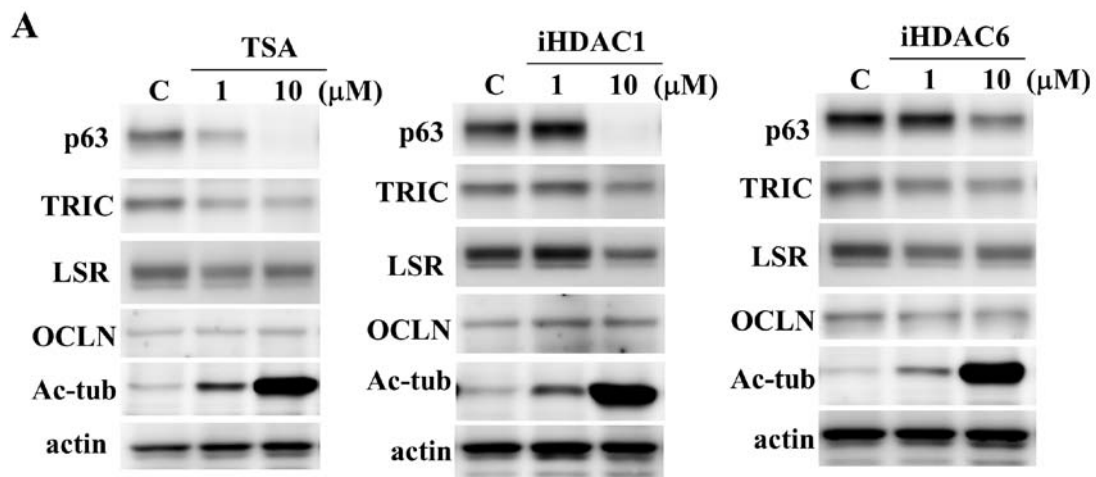

**B**

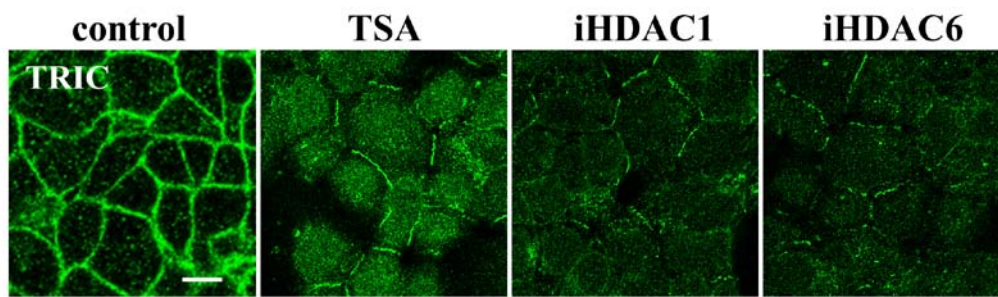

Figure S2. Bar graphs of corresponding expression levels from western blotting in Fig. 2.

**A**

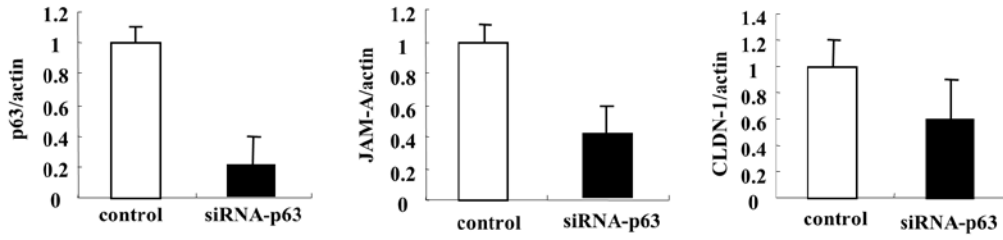

**B**

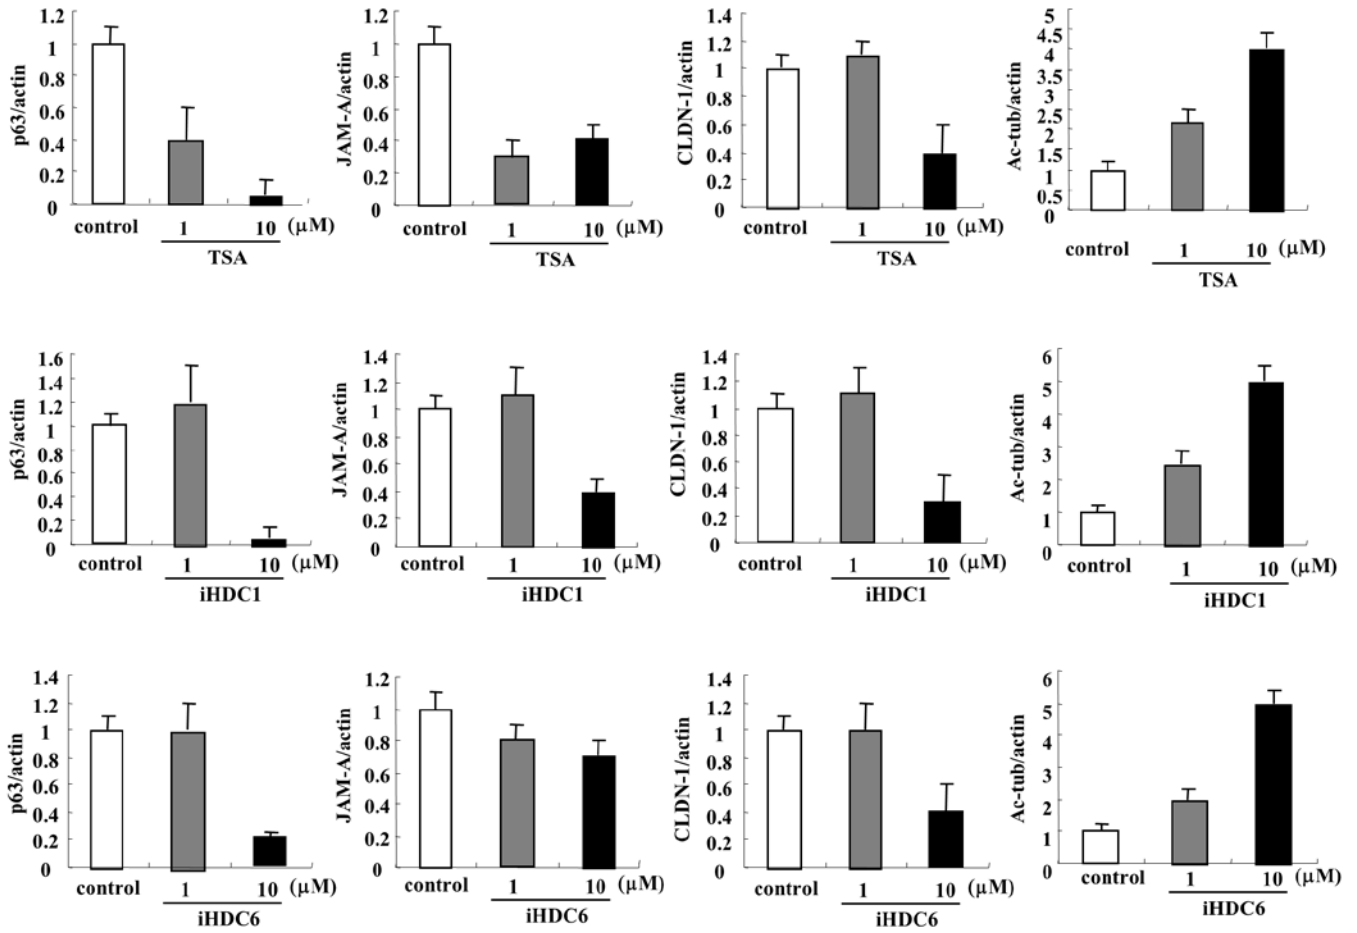

Figure S3. Bar graphs of corresponding expression levels from western blotting in Fig. 4.

C

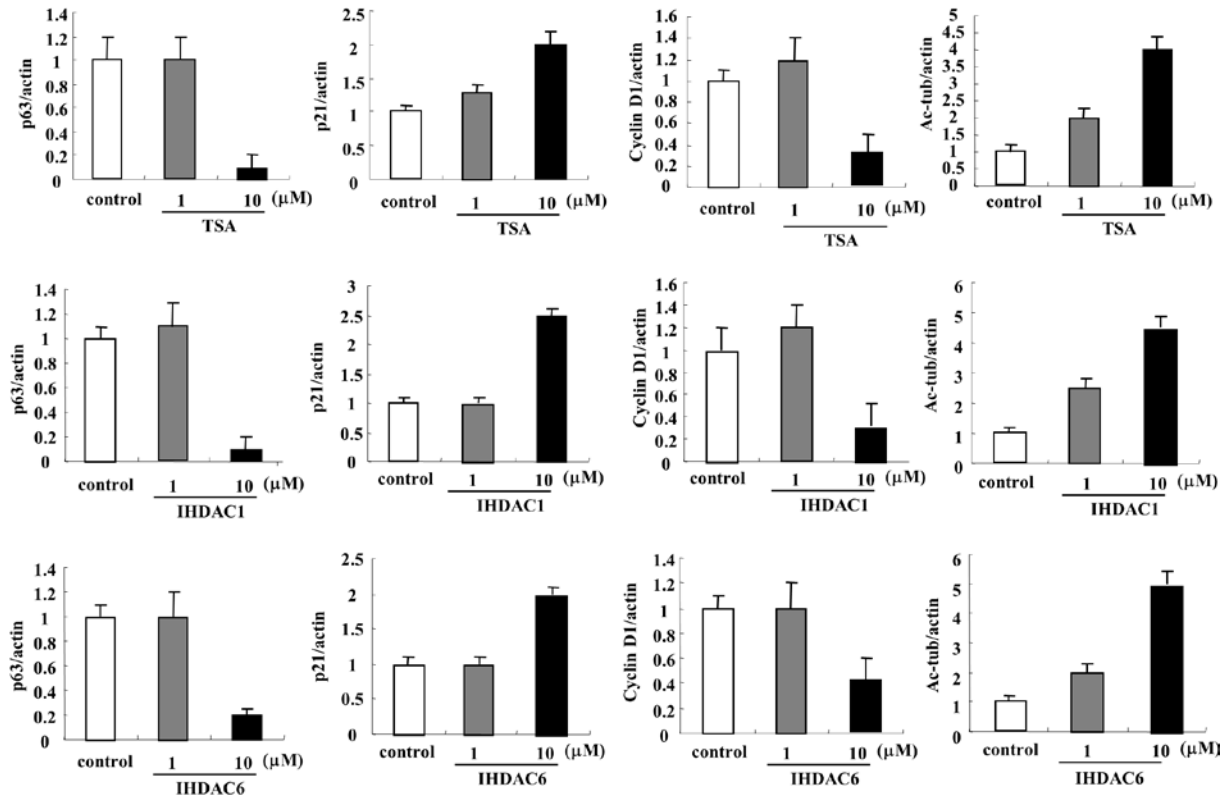

D

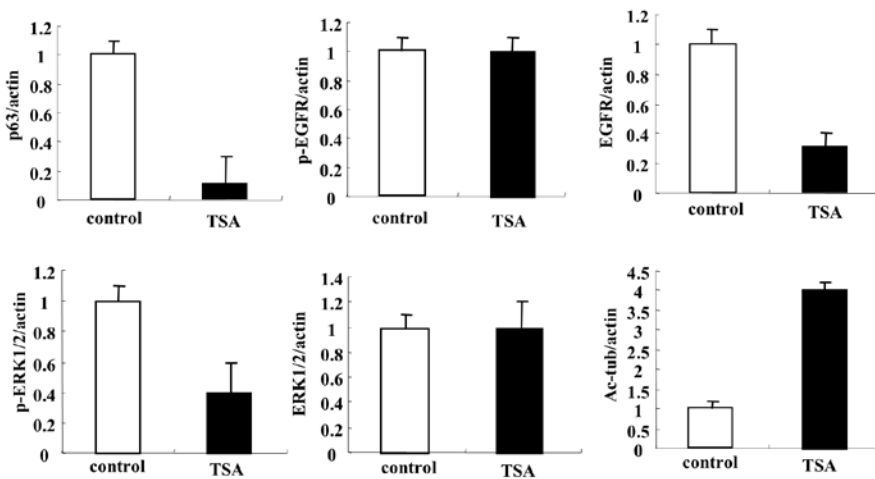

Figure S4. Bar graphs of corresponding expression levels from western blotting in Fig. 5.

**C**

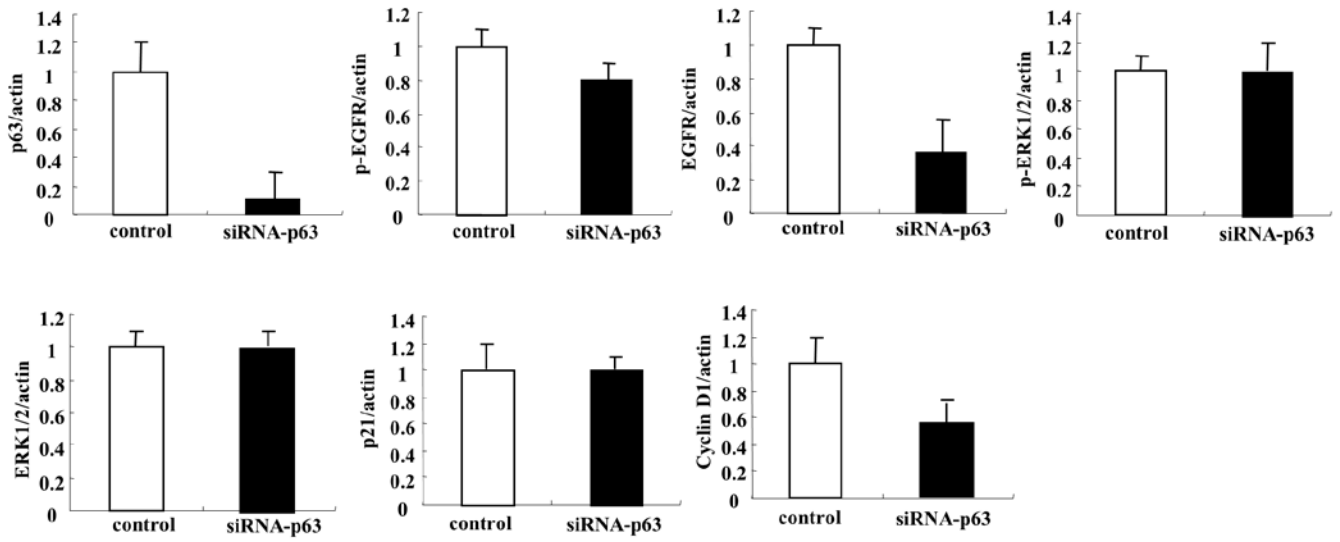

**F**

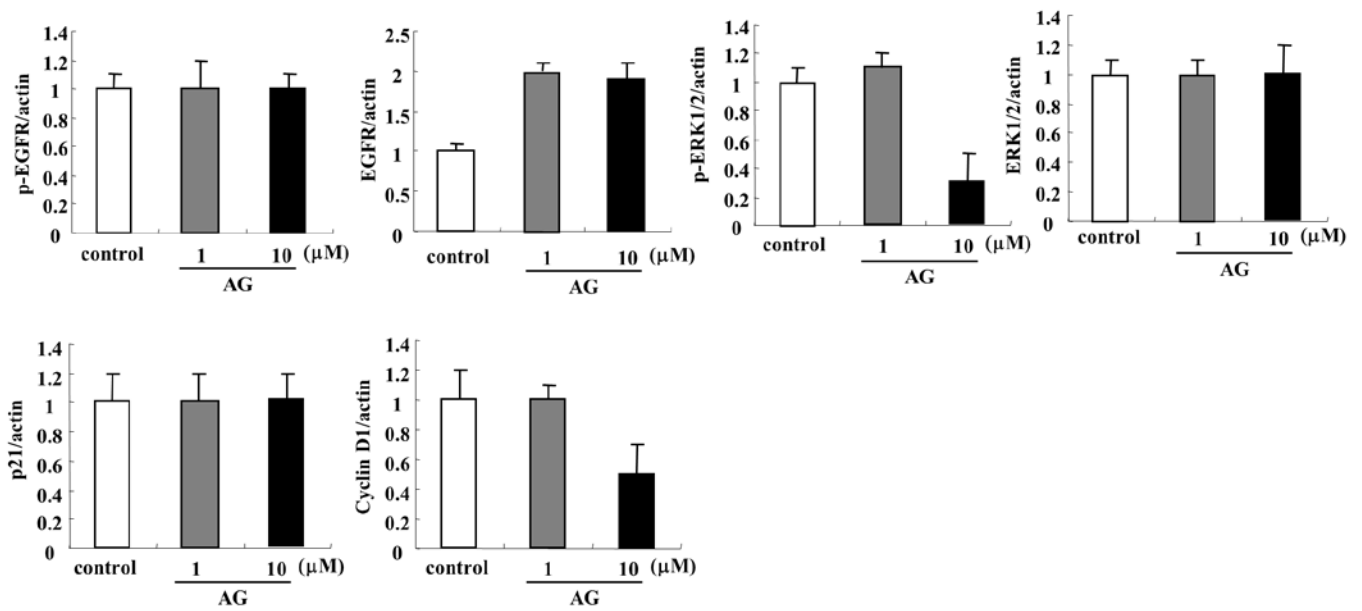

Figure S5. Bar graphs of corresponding expression levels from western blotting in Fig. 6.

**C**

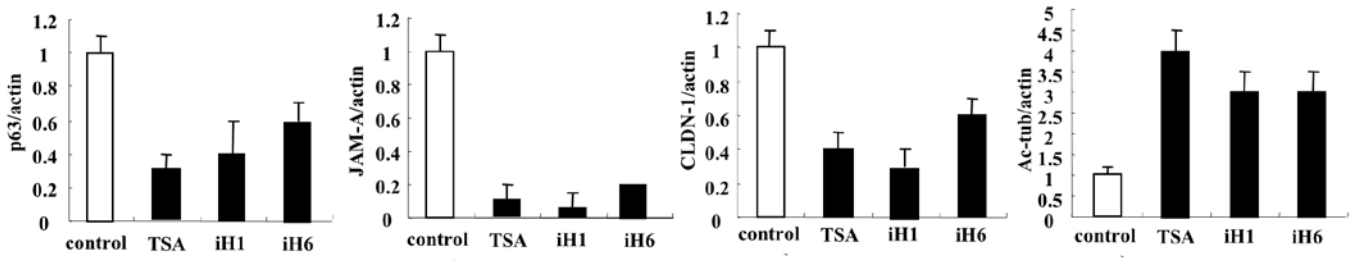

**G**

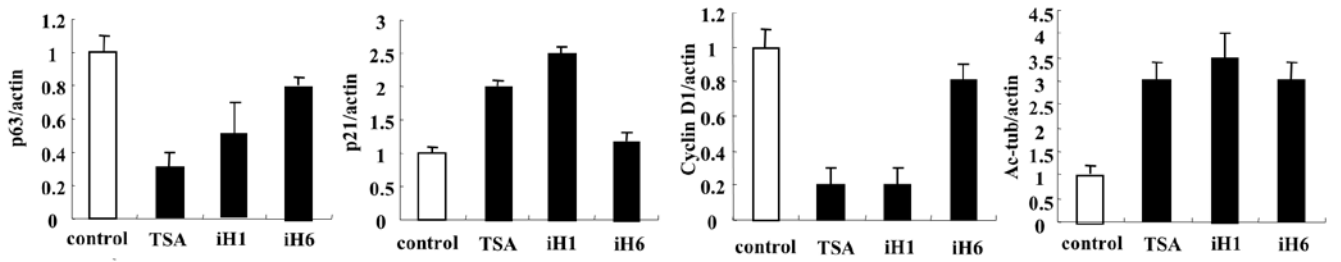

**H**

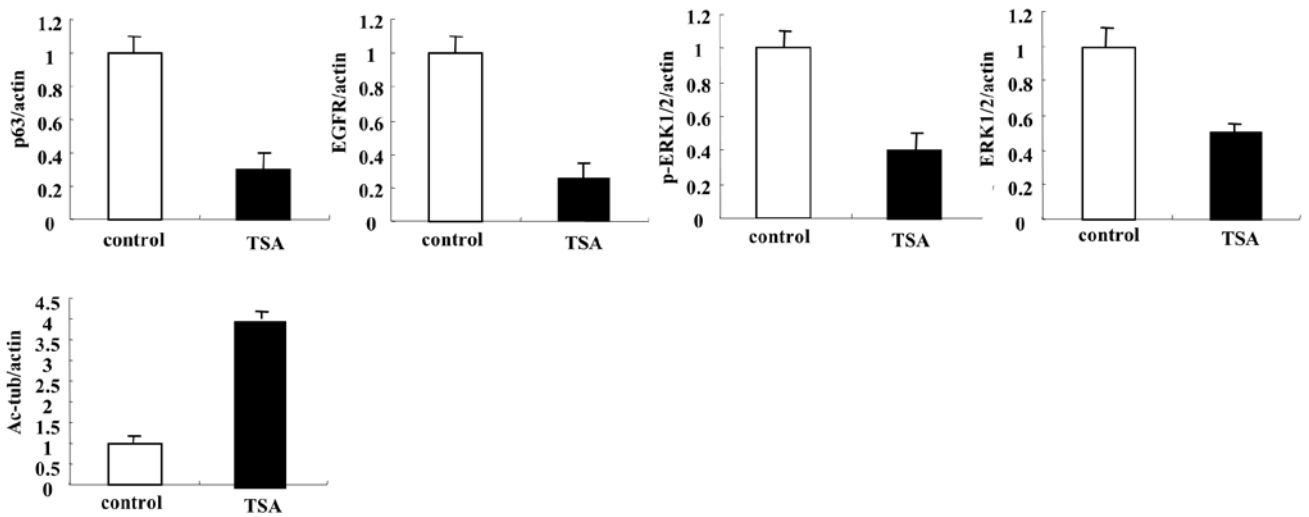

**I**

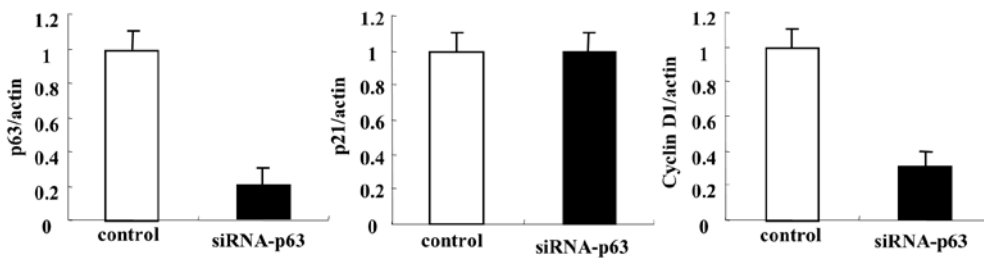

Figure S6. Bar graphs of corresponding expression levels from western blotting in Fig. S1.

**A**

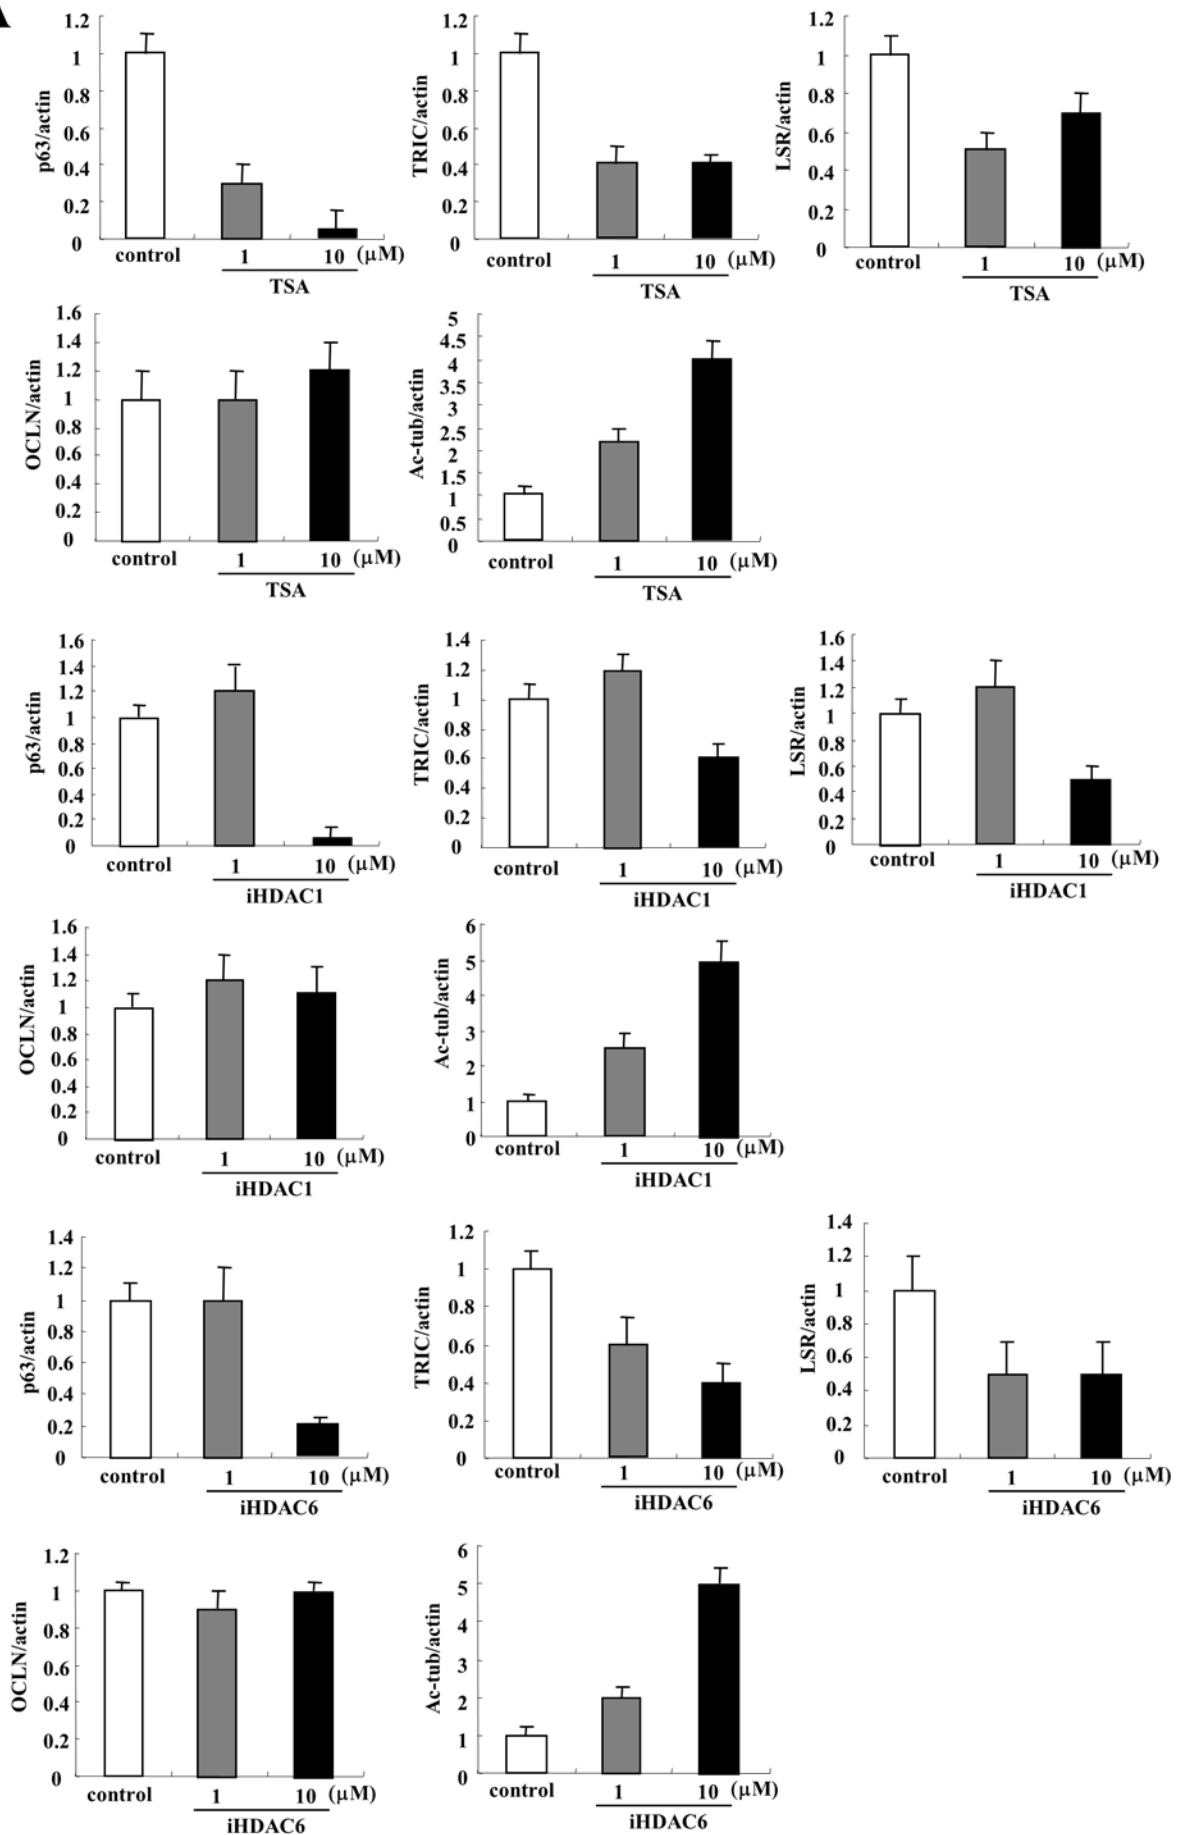

Supplement: Supplementary file 1 [file downloadSupplementary]
